# Supplementary material for: In Vitro Effects of Ligand Bias on Primate Mu Opioid Receptor Downstream Signaling
Source: MDPI journal article supplement (doi:10.3390/ijms21113999), 2020-06-03
Supplement: s1 [file s1]

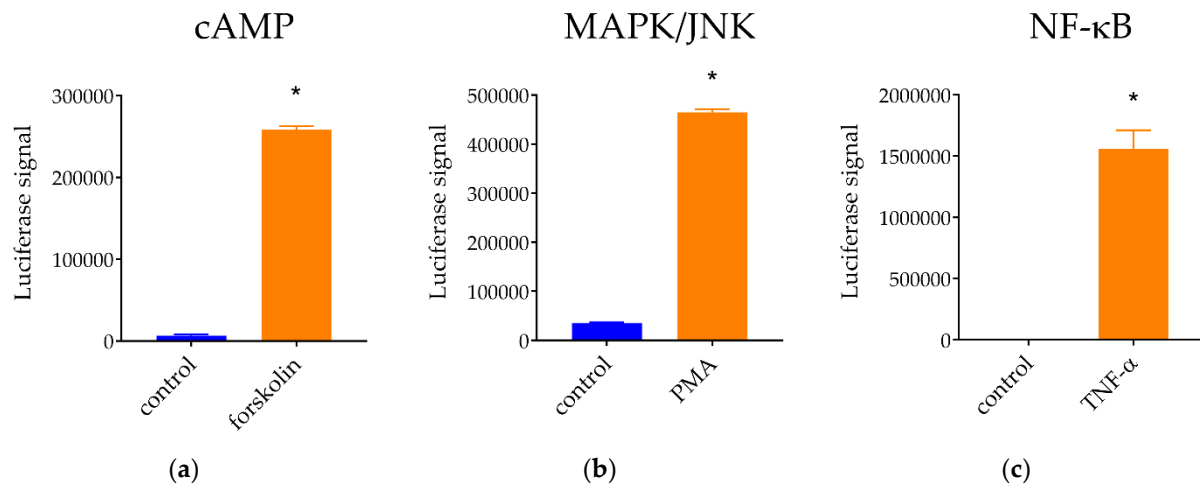

**Figure S1.** Comparisons of the luciferase signals on HEK293 cells transduced with (a) cAMP, (b) MAPK/JNK, (c) NF-κB when treated with saline ("control") or corresponding non-GPCR second messenger signal stimulants. \* indicates  $p < 0.05$  compared to the control.
